# Supplementary material for: Puerarin improves hepatic glucose and lipid homeostasis in vitro and in vivo by regulating the AMPK pathway
Source: Royal Society of Chemistry journal article supplement (doi:10.1039/d0fo02761h), 2021-01-01

## Materials and Methods

### *MTT assay*

Briefly, HepG2 cells were seeded at a density of  $5 \times 10^4$  cells/ml in 96-well plates. After 24h, cells were treated with puerarin (25, 50, 100, 150, 200  $\mu$ M) in complete medium. The plates were then incubated at 37°C for 24 h. 20  $\mu$ L of MTT solution (5mg/ml) was added to each well and the cells were cultured for another 2h. Then the medium was discarded, and the formazan crystals were dissolved with DMSO. The optical density was read at 490 nm using a microplate reader (TECAN, Männedorf, Switzerland). Cell viability rates were calculated by comparing with the control cells.

## Results

### *Effect of puerarin on cell viability*

As shown in Fig.1S, 25, 50, 100, 150  $\mu$ M of puerarin were not cytotoxic to the HepG2 cells. However, the cytotoxicity of puerarin was observed to be at a high concentration of 200  $\mu$ M ( $p < 0.05$ ). Thus, we used 75 and 150  $\mu$ M of puerarin in the following in vitro study.

## Figure Legends

**Figure.1S** Effect of puerarin on cell viability. HepG2 cells were treated with different concentrations of puerarin, and cell viability was measured using MTT assay. Data are presented as mean  $\pm$  SEM (n = 6). \* $p < 0.05$  vs. control cells.

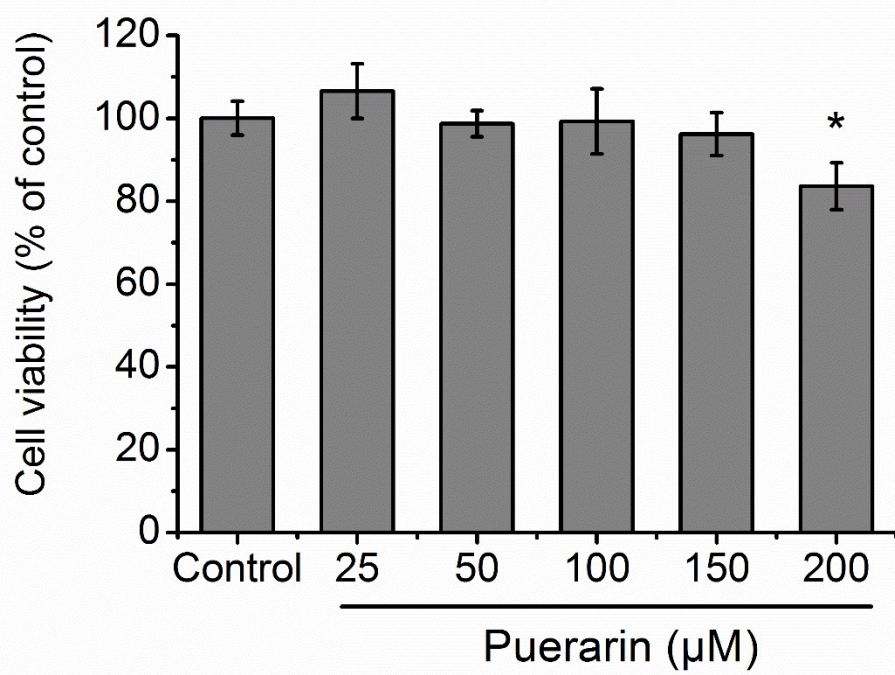

Supplement: d0fo02761h1.pdf [file d0fo02761h1.pdf]
